# Supplementary material
Source: PubMed Central journal article supplement (PMC1995702)

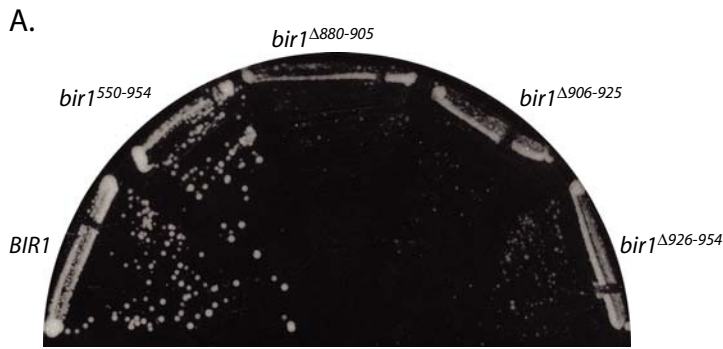

B.

| <u>BIR1 constructs</u> | <u>Growth</u> |
|------------------------|---------------|
| Δ553-590               | +             |
| Δ591-640               | +             |
| Δ641-690               | +             |
| Δ691-740               | +             |
| Δ741-790               | +             |
| Δ791-840               | +             |
| Δ841-879               | +             |
| Δ880-905               | -/+           |
| Δ906-925               | -/+           |
| Δ926-954               | +/-           |
| E892A, E893A           | +/-           |
| W901A                  | -/+           |
| A931E, I935E           | -/+           |

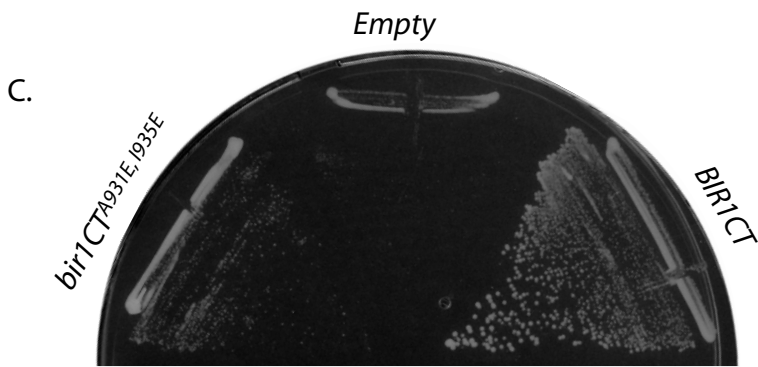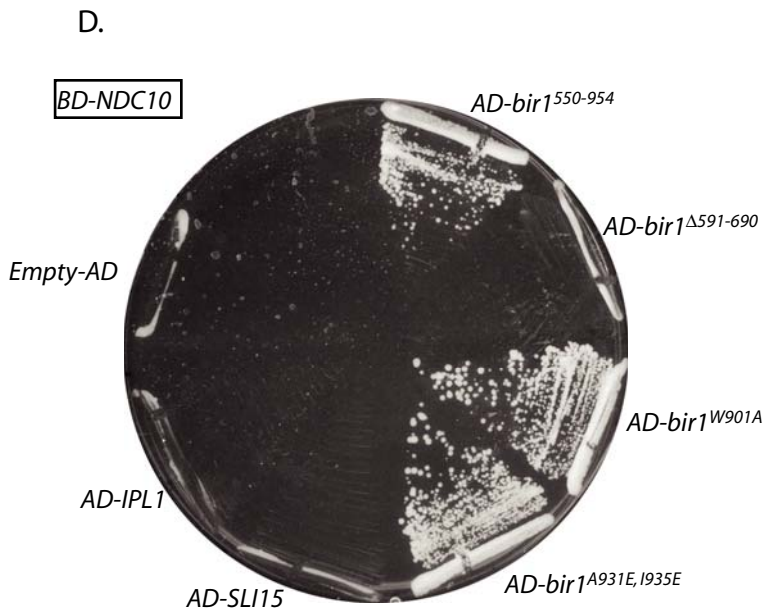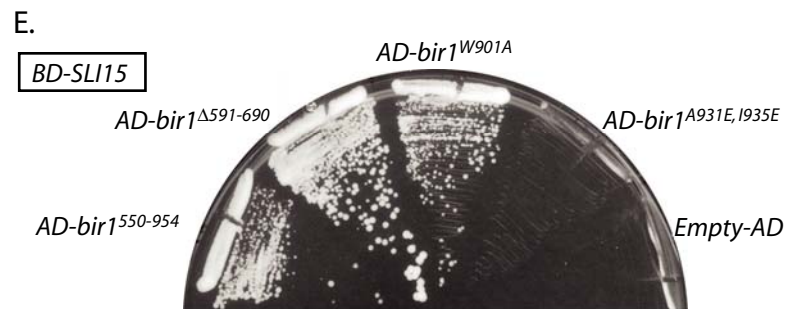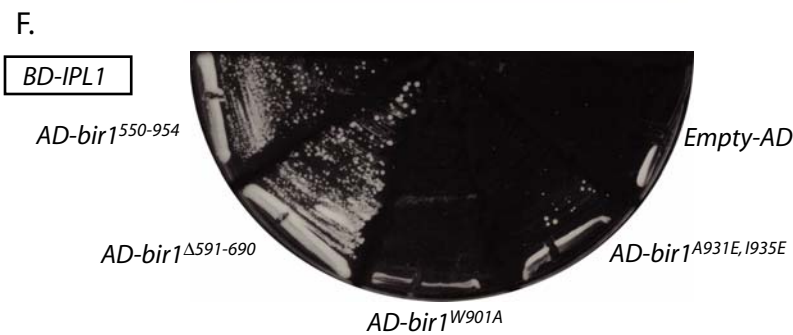

Supplement: E07-03-0201_1.pdf [file E07-03-0201_1.pdf]

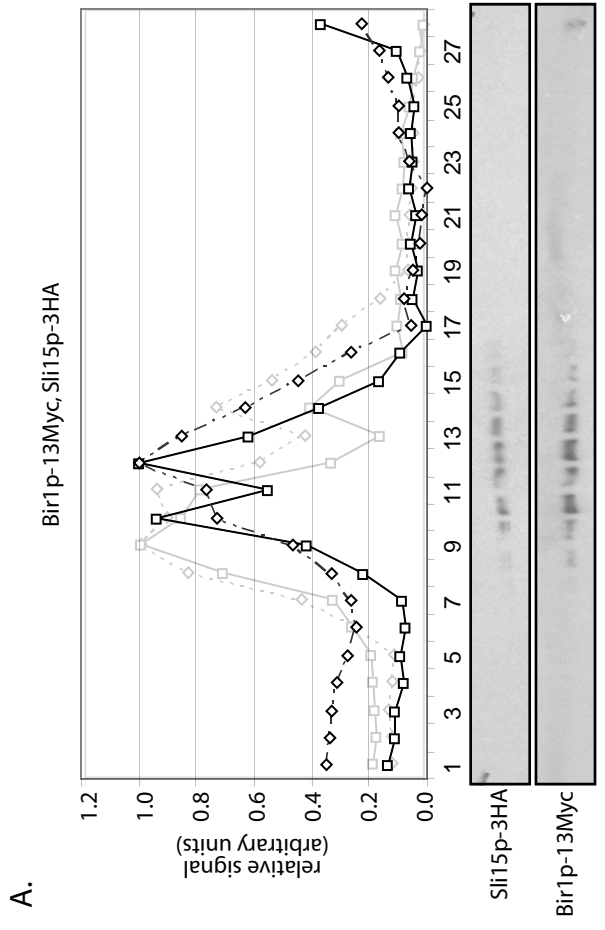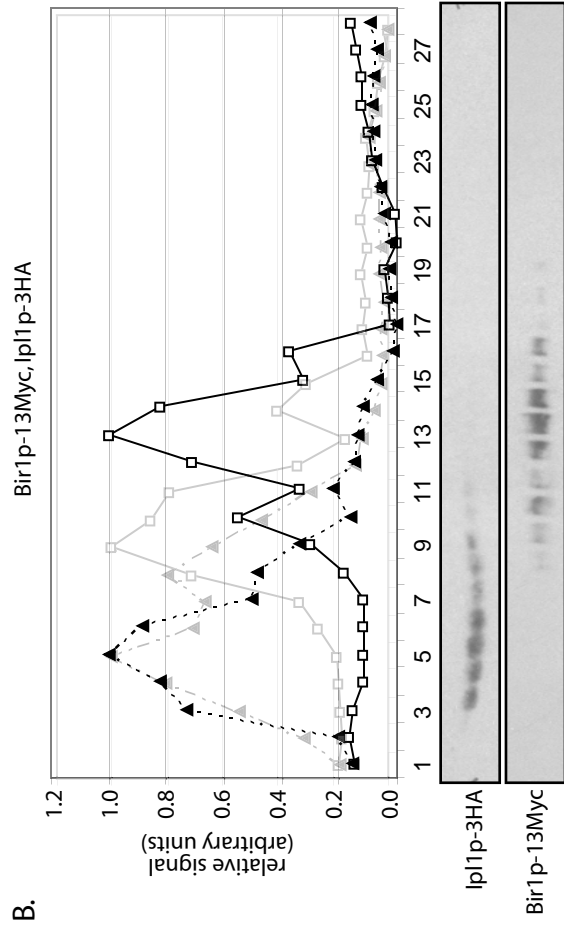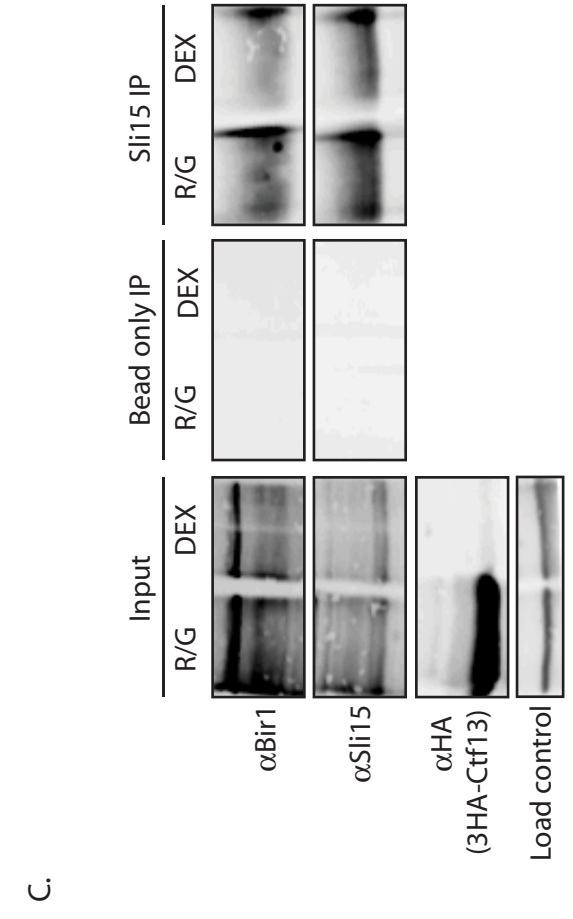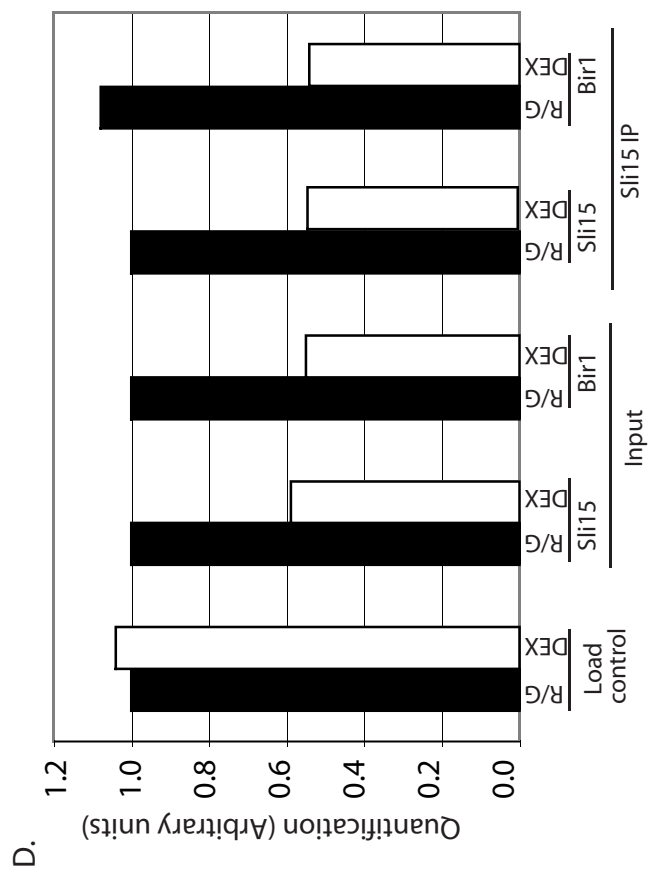

Supplement: E07-03-0201_2.pdf [file E07-03-0201_2.pdf]

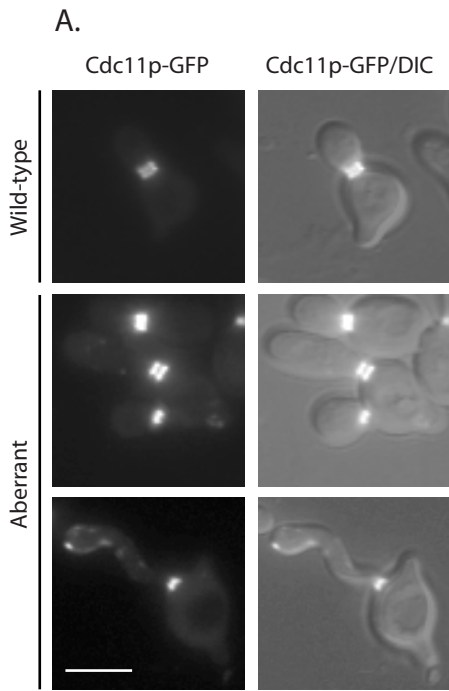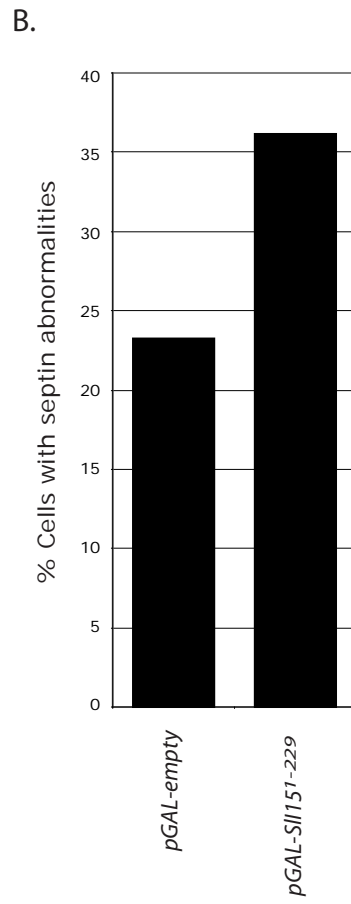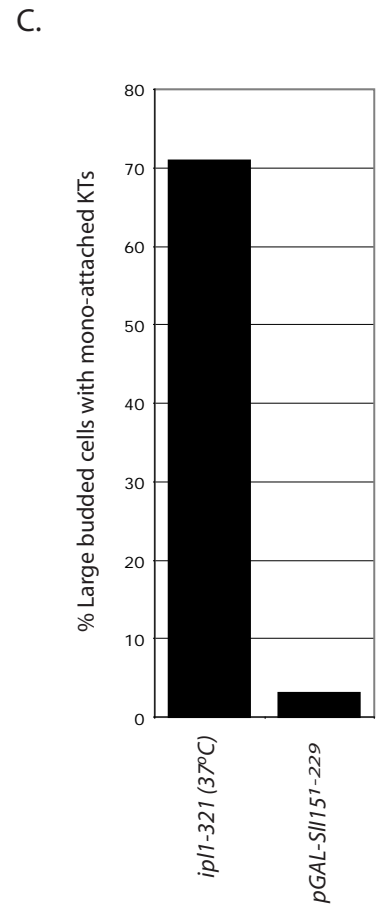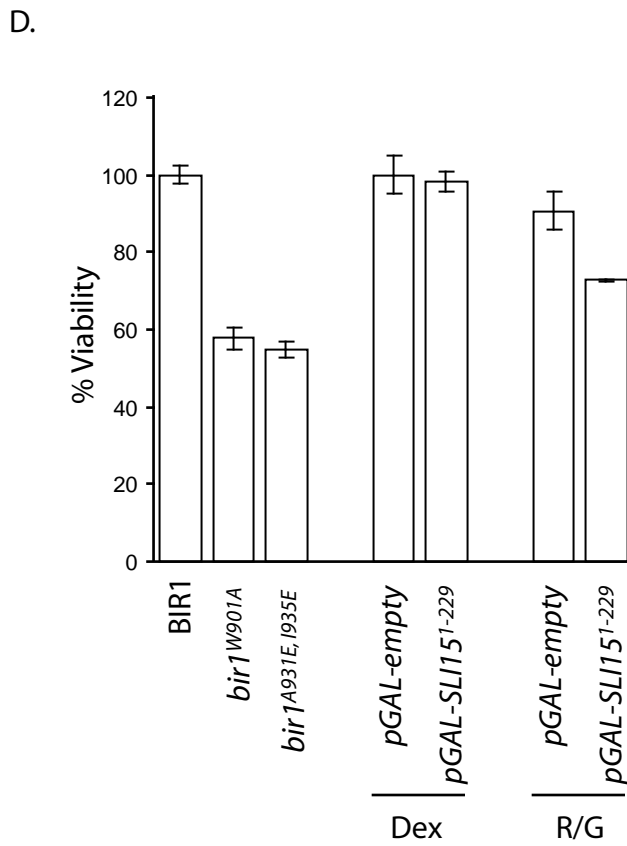

Supplement: E07-03-0201_3.pdf [file E07-03-0201_3.pdf]
